# Supplementary material for: Understanding the structure–activity relationships of different double atom catalysts from density functional calculations: three general rules for efficient CO oxidation
Source: Royal Society of Chemistry journal article supplement (doi:10.1039/d2ta00709f), 2022-01-01
Supplement: d2ta00709f1.pdf [file d2ta00709f1.pdf]

1

## SUPPLEMENTARY INFORMATION

2

### Understanding the structure-activity relationships of different

3

### double atom catalysts from density functional calculations: Three

4

### general rules for efficient CO oxidation

5

Qianyu Li<sup>1,2</sup>, Junhui Zhou<sup>1,2,3</sup>, Didi Li<sup>1,2</sup>, Zhimin Ao<sup>1,2\*</sup>

6 <sup>1</sup>Guangdong-Hong Kong-Macao Joint Laboratory for Contaminants Exposure and Health, Guangzhou  
7 Key Laboratory Environmental Catalysis and Pollution Control, Institute of Environmental Health  
8 and Pollution Control, Guangdong University of Technology, Guangzhou 510006, China

9 <sup>2</sup>Guangdong Key Laboratory of Environmental Catalysis and Health Risk Control, Key Laboratory for  
10 City Cluster Environmental Safety and Green Development of the Ministry of Education, School of  
11 Environmental Science and Engineering, Guangdong University of Technology, Guangzhou  
12 510006, PR China

13 <sup>3</sup>School of Environment, Beijing Normal University, Xijiekouwai Street No. 19, Beijing 100875, PR  
14 China.

15 Corresponding author's email address: [zhimin.ao@gdut.edu.cn](mailto:zhimin.ao@gdut.edu.cn)

16 Pages (15)

17 Tables (7)

- 18 ● Table.S1 Geometrical and electronic parameters for UiO-66 and M/UiO-66.  
19 ● Table S2 The total energy of each structure corresponding to Fig. S5 above.  
20 ● Table. S3 The adsorption energy of atomic O on UiO-66 and M/UiO-66.  
21 ● Table. S4 The rate-limiting energy of barrier and the optimal mechanism of other reported DACs.  
22 ● Table. S5 The OC-O distance of IS, TS, and FS in the second CO oxidation of ER mechanism, and its  
23 corresponding energy of barrier.  $\Delta\varepsilon_d$   
24 ● Table. S6 The energy barrier of each step in different mechanism, the d-band center ( $\varepsilon_d$ ), the d-band center  
25 difference ( $\Delta\varepsilon_d$ ), and the differential ratio ( $\varepsilon_d^{(IS)}$ ) of IS and TS.  
26 ● Table. S7 The adsorption energy of each system for individual adsorbates and the corresponding rate-  
27 limiting  $E_{bar}$  under the optimal mechanism.

28 Figures (17)

- 29 ● Fig. S1 The PDOS of each M/UiO-66.  
30 ● Fig. S2 The spin density of states of each M/UiO-66.  
31 ● Fig. S3 The frequency of each M/UiO-66.  
32 ● Fig. S4 The configuration of O<sub>2</sub> and CO adsorbed on M/UiO-66.  
33 ● Fig. S5 The PDOS of O<sub>2</sub> and CO molecule adsorbed on M/UiO-66.  
34 ● Fig. S6 The configuration of O<sub>2</sub> and CO adsorbed on Au, Cu, and Ag systems.  
35 ● Fig. S7 The top side of M/UiO-66 under ER, LH, and TER mechanism, and the situation of two CO molecules  
36 adsorbed.  
37 ● Fig. S8 The ER mechanism reaction pathway of Cd/UiO-66.  
38 ● Fig. S9 The ER mechanism reaction pathway of Cd/UiO-66 (another case).  
39 ● Fig. S10 The ER and LH mechanism reaction pathway of Pd/UiO-66.  
40 ● Fig. S11 The ER and LH mechanism reaction pathway of Cu/UiO-66.  
41 ● Fig. S12 The ER and LH mechanism reaction pathway of Ag/UiO-66.  
42 ● Fig. S13 The ER and LH mechanism reaction pathway of Au/UiO-66.  
43 ● Fig. S14 The TER mechanism reaction pathway of Cd/UiO-66.  
44 ● Fig. S15 The TER mechanism reaction pathway of Pt/UiO-66.  
45 ● Fig. S16 The TER mechanism reaction pathway of Cu/UiO-66.  
46 ● Fig. S17 The TER mechanism reaction pathway of Au/UiO-66.

47

49

50 **Table S1** Geometrical parameters ( $d_{M-O}$  and  $d_{M-M}$ ) for the M/UiO-66, doping energies ( $E_b$ ), Hirshfeld charge ( $Q$ ),51 the d-band center ( $\epsilon_d$ ) and the upper-edge of the d band ( $\epsilon_d^W$ ) of the doped metal atom, respectively.

| Metal | $d_{M-O}$ (Å) | $d_{MA-MB}$ (Å) | $E_b$ (eV) | $Q$ (e) | $\epsilon_d$ (eV) | $\epsilon_d^W$ (eV) |
|-------|---------------|-----------------|------------|---------|-------------------|---------------------|
| Ni    | 1.81          | 5.68            | -11.49     | 0.08    | -0.95             | 2.99                |
| Pd    | 2.10          | 4.46            | -6.98      | 0.31    | -1.20             | 2.11                |
| Pt    | 2.18          | 4.20            | -6.39      | 0.18    | -1.29             | 2.00                |
| Cu    | 1.86          | 5.67            | -10.57     | 0.26    | -1.09             | 2.31                |
| Ag    | 2.20          | 4.61            | -8.16      | 0.36    | -2.14             | 0.47                |
| Au    | 2.28          | 4.37            | -7.47      | 0.36    | -2.37             | 0.25                |
| Zn    | 1.80          | 5.84            | -6.98      | 0.50    | -8.38             | -4.58               |
| Cd    | 2.36          | 3.18            | -7.57      | 0.34    | -7.59             | -5.19               |
| Hg    | 2.43          | 3.10            | -7.28      | 0.36    | -6.99             | -4.86               |

52

53 **Table S2** The total energy of each structure corresponding to Fig. S5 above.

| Structure | Total energy (Ha) |
|-----------|-------------------|
| a2        | -61193.65378      |
| a4        | -61193.65827      |
| b2        | -28736.12221      |
| b4        | -28736.11239      |
| c2        | -35854.56412      |
| c4        | -35854.55299      |

54

55 **Table S3** The adsorption energy of atomic O on UiO-66 and M/UiO-66.

| Group | System    | $E_{ads}(O)$ (eV) |
|-------|-----------|-------------------|
| /     | UiO-66    | -2.79             |
| VIII  | Pd/UiO-66 | -1.50             |
|       | Pt/UiO-66 | -1.60             |
|       | Cu/UiO-66 | -0.34             |
| IB    | Ag/UiO-66 | -0.54             |
|       | Au/UiO-66 | -0.48             |
| IIB   | Zn/UiO-66 | -3.14             |
|       | Cd/UiO-66 | -1.78             |

56

58

59 **Table S4** The rate-limiting energy of barrier ( $E_{\text{bar}}$ ) and the optimal mechanism of other reported DACs.

| Catalysts                                                                       | Optimal mechanism            | Rate-limiting $E_{\text{bar}}$ (eV) | Reference                                              |
|---------------------------------------------------------------------------------|------------------------------|-------------------------------------|--------------------------------------------------------|
| Zn/UiO-66<br>(Double atom catalyst, DAC)                                        | Eley-Rideal (ER)             | 0.14                                | This research                                          |
| Ag/UiO-66<br>(DAC)                                                              | termolecular ER (TER)        | 0.22                                | This research                                          |
| Cd/UiO-66<br>(DAC)                                                              | ER                           | 0.35                                | This research                                          |
| Pd/UiO-66<br>(DAC)                                                              | TER                          | 0.36                                | This research                                          |
| Cu/UiO-66<br>(DAC)                                                              | ER                           | 0.37                                | This research                                          |
| Pt/UiO-66<br>(DAC)                                                              | ER                           | 0.40                                | This research                                          |
| Au/UiO-66<br>(DAC)                                                              | TER                          | 0.58                                | This research                                          |
| Cu <sub>2</sub> @C <sub>2</sub> N monolayer<br>(DAC)                            | Langmuir-Hinshelwood<br>(LH) | 0.29                                | <i>Nanoscale</i> , 2018, <b>10</b> , 15696             |
| Fe <sub>1</sub> Cu <sub>1</sub> @C <sub>2</sub> N monolayer<br>(DAC)            | TER                          | 0.42                                | <i>Small Methods</i> , 2019, <b>3</b> , 1800480        |
| FeFe@N <sub>6</sub> graphene<br>(DAC)                                           | TER                          | 0.30                                | <i>Colloid Surf. A</i> , 2021, <b>621</b> , 126575     |
| Au <sub>1</sub> /Co <sub>3</sub> O <sub>4</sub><br>(Single atom catalysts, SAC) | LH                           | 0.14                                | <i>ACS Catal</i> , 2020, <b>10</b> , 6094–6101         |
| Cu/V <sub>b</sub> -BN<br>(SAC)                                                  | TER                          | 0.45                                | <i>Catal Today</i> , 2021, <b>368</b> , 148–160        |
| Al-MoS <sub>2</sub><br>(SAC)                                                    | ER                           | 0.19                                | <i>Appl. Surf. Sci.</i> , 2019, <b>484</b> , 1297-1303 |
| Ti/Zr <sub>2</sub> CO <sub>2</sub><br>(SAC)                                     | ER                           | 0.58                                | <i>Appl. Surf. Sci.</i> , 2022, <b>575</b> , 15177     |
| MnO <sub>2</sub><br>(Metal Oxide)                                               | Mars-van-Krevelen<br>(Mvk)   | 0.54                                | <i>Appl. Catal. B</i> , 2022, <b>300</b> , 120715      |
| Au NPs/CeO <sub>2</sub><br>(Nanoparticles, NPs)                                 | Mvk                          | 0.40                                | <i>ACS Catal.</i> 2018, <b>8</b> , 11491–11501         |

60

61 **Table S5** The distance of OC-O of IS, TS, and FS in the oxidation process of the second CO under ER mechanism,  
62 and its corresponding energy of barrier ( $E_{\text{bar}}$ ), the Cd-DAC has two situations\*.

| System     | $E_{\text{bar}}$ (eV) | $d(\text{OC-O})$ (Å) |       |       |
|------------|-----------------------|----------------------|-------|-------|
|            |                       | IS                   | TS    | FS    |
| UiO-66     | 0.43                  | 2.859                | 1.610 | 1.178 |
| Pd/UiO-66  | 0.15                  | 2.683                | 2.082 | 1.281 |
| Pt/UiO-66  | 0.23                  | 2.772                | 2.100 | 1.294 |
| Cu/UiO-66  | 0.05                  | 2.891                | 2.219 | 1.174 |
| Ag/UiO-66  | 0.06                  | 3.201                | 2.260 | 1.184 |
| Au/UiO-66  | 0.07                  | 2.817                | 2.090 | 1.183 |
| Zn/UiO-66  | 0.14                  | 2.996                | 2.037 | 1.179 |
| Cd/UiO-66* | 0.34                  | 2.750                | 1.638 | 1.180 |
|            | 0.94                  | 1.306                | 1.276 | 1.173 |

63 **\*Text S1** The two situations of Cd-DAC are shown in Fig. S7 and S8.

65

66 **Table S6** The energy barrier ( $E_{\text{bar}}$ ) of each step in different mechanism, the d-band center ( $\epsilon_d$ ), the d-band center  
 67 difference ( $\Delta\epsilon_d$ ) of the metal atom in IS and TS under all oxidation processes, and the corresponding differential  
 68 ratio ( $\frac{\Delta\epsilon_d}{\epsilon_d(\text{IS})}$ ).  
 69

| System    | Mechanism-step | $E_{\text{bar}}$<br>(eV) | $\epsilon_d$ (IS)<br>(eV) | $\epsilon_d$ (TS)<br>(eV) | $\Delta\epsilon_d$<br>(eV) | $\frac{\Delta\epsilon_d}{\epsilon_d(\text{IS})}$ |
|-----------|----------------|--------------------------|---------------------------|---------------------------|----------------------------|--------------------------------------------------|
| Pd/UiO-66 | ER-1           | 1.48                     | -1.77                     | -2.13                     | -0.36                      | 20.34%                                           |
|           | ER-2           | 0.15                     | -2.20                     | -2.08                     | 0.12                       | -5.45%                                           |
|           | LH-1           | 1.94                     | -1.87                     | -1.33                     | 0.54                       | -28.88%                                          |
|           | TER-1          | 0.11                     | -2.24                     | -2.06                     | 0.18                       | -8.04%                                           |
| Pt/UiO-66 | ER-1           | 0.40                     | -2.19                     | -1.63                     | 0.56                       | -25.57%                                          |
|           | ER-2           | 0.23                     | -2.42                     | -2.14                     | 0.28                       | -11.57%                                          |
|           | LH-1           | 1.74                     | -2.06                     | -2.66                     | -0.60                      | 29.13%                                           |
|           | TER-1          | 0.80                     | -2.38                     | -2.29                     | 0.09                       | -3.78%                                           |
| Cu/UiO-66 | ER-1           | 0.37                     | -2.10                     | -2.13                     | -0.03                      | 1.43%                                            |
|           | ER-2           | 0.05                     | -1.82                     | -1.96                     | -0.14                      | 7.69%                                            |
|           | LH-1           | 0.41                     | -2.48                     | -1.94                     | 0.35                       | -14.11%                                          |
|           | TER-1          | 0.44                     | -2.33                     | -2.16                     | 0.16                       | -6.87%                                           |
| Ag/UiO-66 | ER-1           | 0.84                     | -3.24                     | -2.80                     | 0.44                       | -13.58%                                          |
|           | ER-2           | 0.06                     | -2.71                     | -2.87                     | -0.16                      | 5.90%                                            |
|           | LH-1           | 1.00                     | -3.27                     | -2.86                     | 0.41                       | -12.54%                                          |
|           | TER-1          | 0.22                     | -3.32                     | -3.42                     | -0.11                      | 3.31%                                            |
| Au/UiO-66 | ER-1           | 1.05                     | -3.42                     | -3.09                     | 0.33                       | -9.65%                                           |
|           | ER-2           | 0.07                     | -3.10                     | -3.09                     | 0.01                       | -0.32%                                           |
|           | LH-1           | 2.05                     | -3.54                     | -3.30                     | 0.24                       | -6.90%                                           |
|           | TER-1          | 0.58                     | -3.51                     | -3.16                     | 0.36                       | -10.26%                                          |
| Zn/UiO-66 | ER-1           | 0.10                     | -6.29                     | -6.13                     | 0.16                       | -2.54%                                           |
|           | ER-2           | 0.14                     | -5.53                     | -5.64                     | -0.11                      | 1.99%                                            |
|           | TER-1          | 0.02                     | -5.15                     | -5.00                     | 0.15                       | -2.91%                                           |
| Cd/UiO-66 | ER-1           | 0.13                     | -8.18                     | -7.77                     | 0.41                       | -5.01%                                           |
|           | ER-2           | 0.34                     | -7.55                     | -8.44                     | -0.90                      | 11.92%                                           |
|           | TER-1          | 0.46                     | -7.84                     | -8.17                     | -0.33                      | 4.21%                                            |

70

71 **Table S7** The adsorption energy of each system for individual adsorbates and the corresponding rate-limiting  $E_{\text{bar}}$   
 72 under the optimal mechanism.

| System    | Mechanism | $E_{\text{bar}}$ (eV) | $E_{\text{ads}}(\text{O}_2)$ (eV) | $E_{\text{ads}}(\text{CO})$ (eV) |
|-----------|-----------|-----------------------|-----------------------------------|----------------------------------|
| UiO-66    | ER        | 0.60                  | -0.82                             | -0.25                            |
| Pd/UiO-66 | TER       | 0.35                  | -2.37                             | -2.03                            |
| Pt/UiO-66 | ER        | 0.40                  | -2.48                             | -2.21                            |
| Cu/UiO-66 | ER        | 0.36                  | -1.13                             | -1.27                            |
| Ag/UiO-66 | TER       | 0.30                  | -0.49                             | -1.03                            |
| Au/UiO-66 | TER       | 0.58                  | -0.32                             | -1.16                            |
| Zn/UiO-66 | ER        | 0.10                  | -3.27                             | -0.95                            |
| Cd/UiO-66 | ER        | 0.46                  | -1.49                             | -0.23                            |

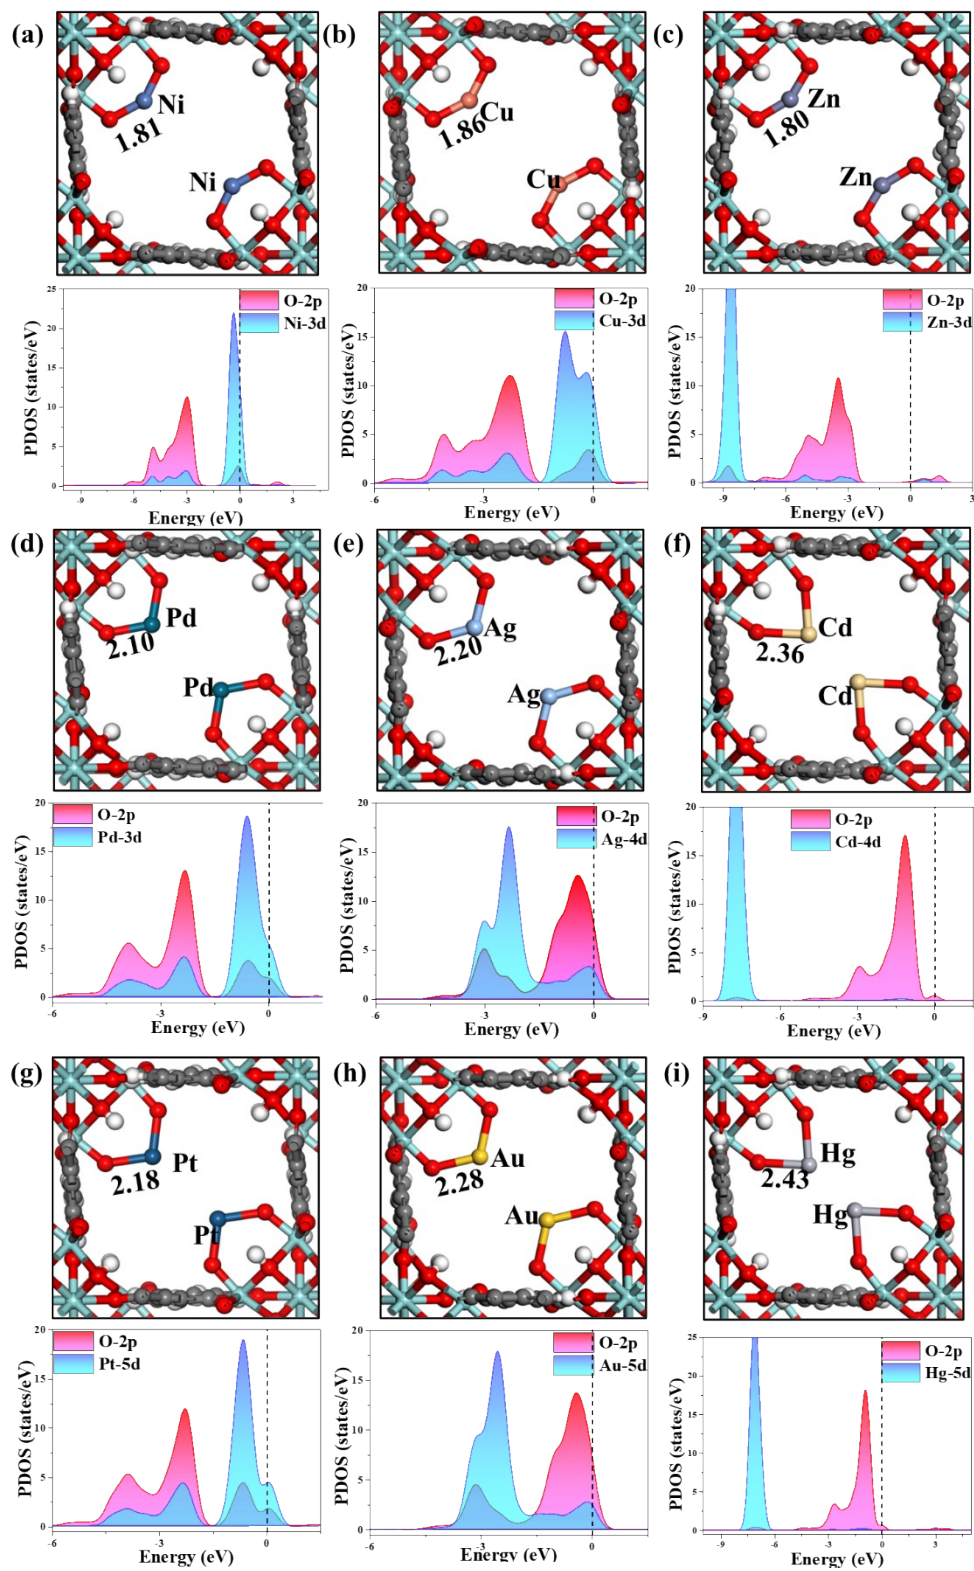

74

75

76 **Fig. S1** In the PDOS of M/UiO-66, the intense hybridization suggests a strong interaction between the metal atom  
 77 and substrate. The Fermi level is set to zero, as shown by the dashed line.

78

79

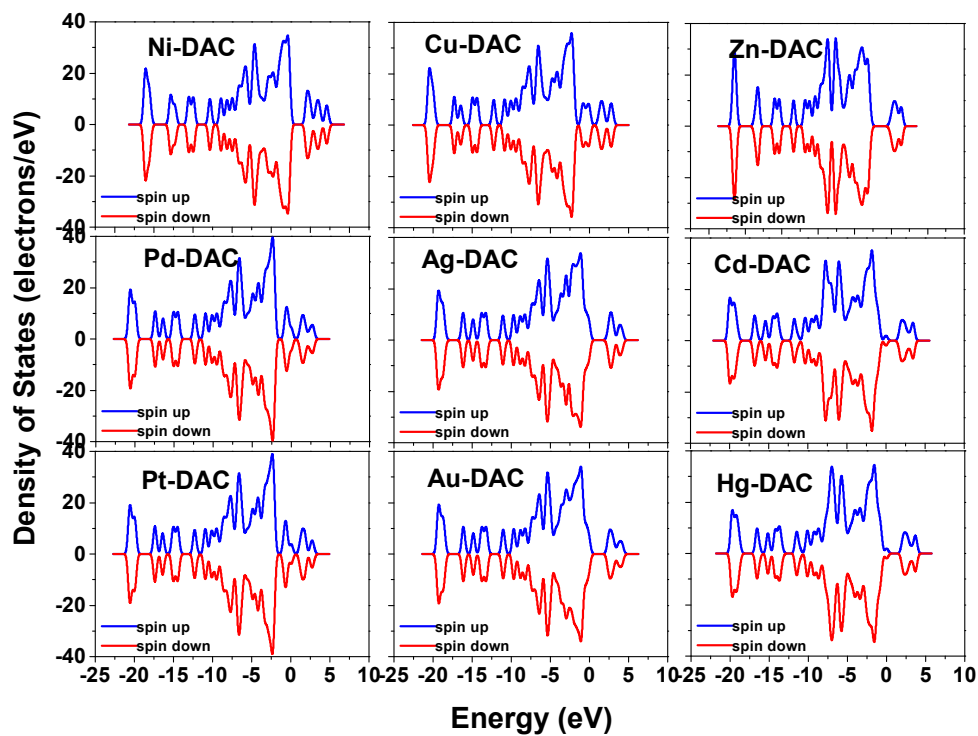

80 Fig. S2 The spin density of states of each M/UiO-66.

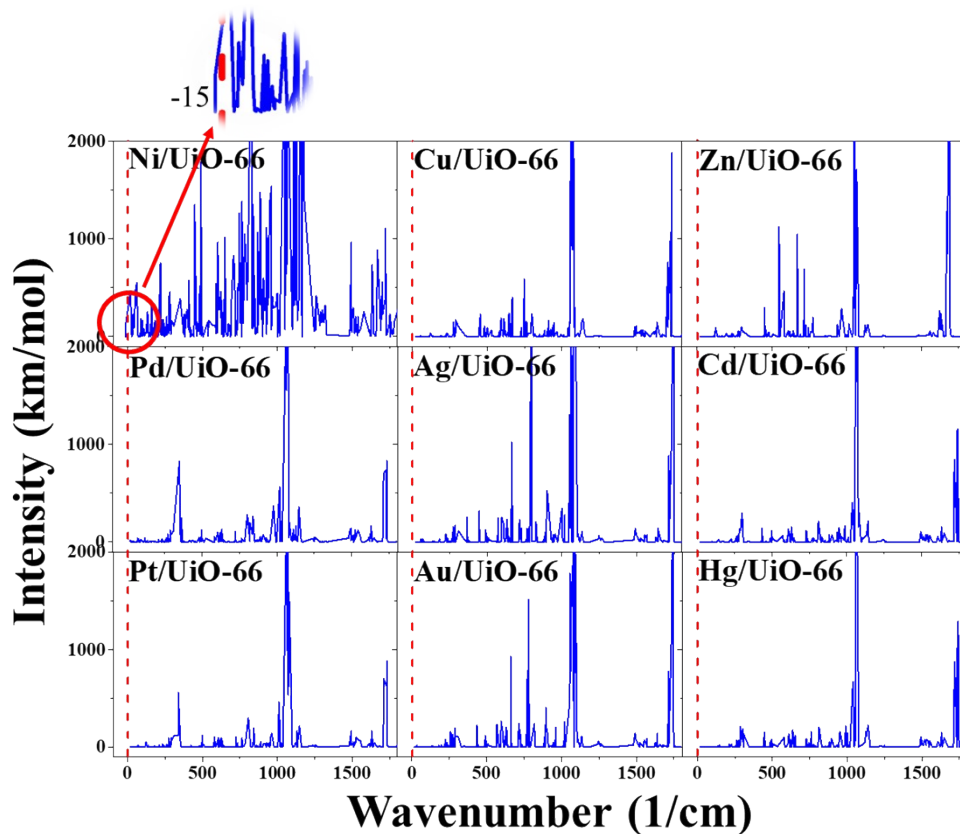

81 Fig. S3 The frequency of all M/UiO-66, the blue lines represent the frequency intensity at different wavelengths,  
 82 and the dotted red lines represent the Fermi levels.

83

84

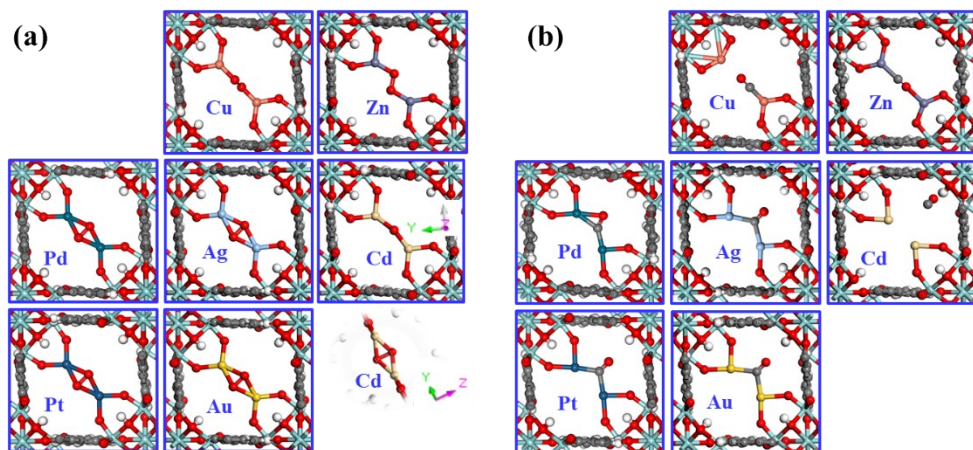

85

86 **Fig. S4** The configuration of O<sub>2</sub> (a) and CO (b) adsorbed on M/UiO-66.

87

88

89

90

91

92

93

94

95

96

97

98

99

100

101

102

103

104

105

106

107

108

109

110

111

112

113

114

115

116

117

118

119

120

121

122

123

124



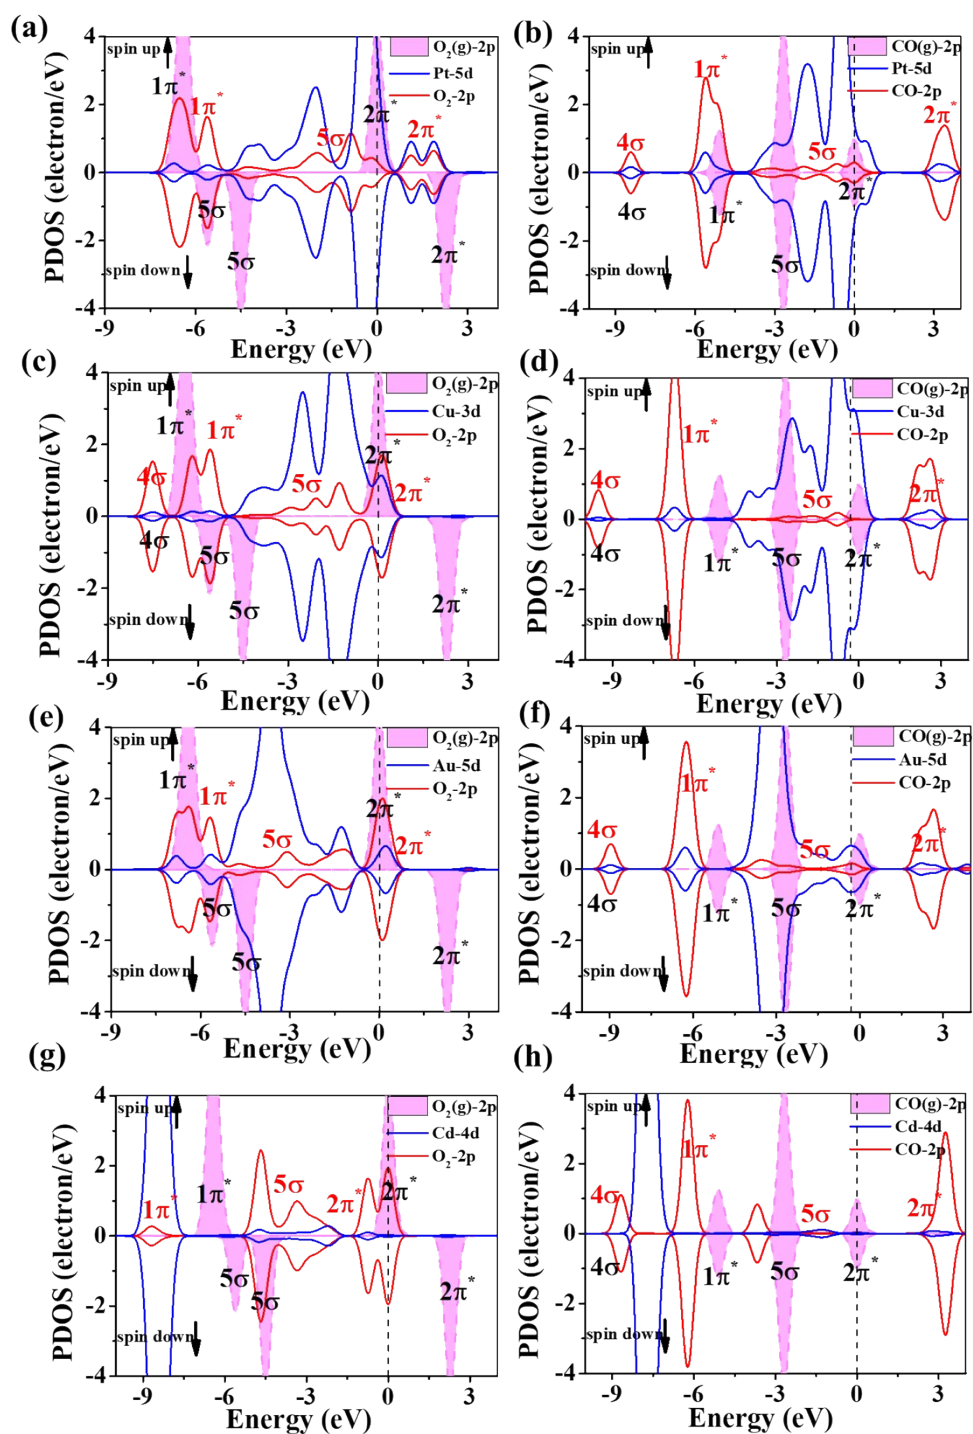

125  
 126  
 127  
 128  
 129  
 130  
 131  
 132  
 133  
 134  
 135  
 136

**Fig. S5** The PDOS of O<sub>2</sub> and CO molecule adsorbed on M/UIO-66. The energy levels of the adsorbed O<sub>2</sub> and CO molecule orbitals are aligned according to the Fermi levels of the corresponding system. The Fermi level is set to zero, as shown by the dashed line.



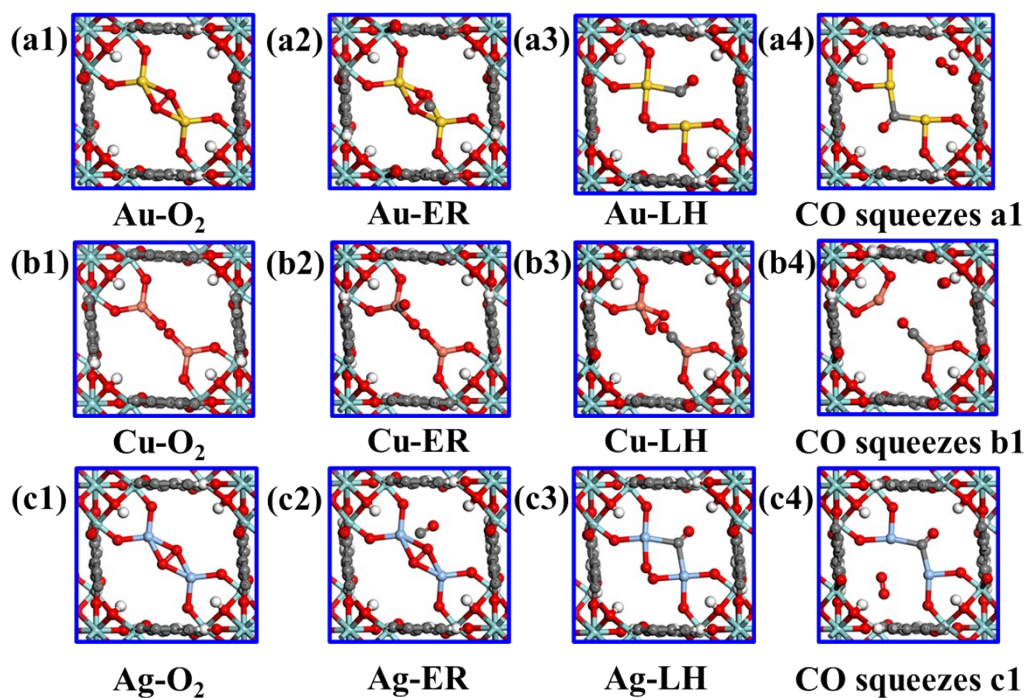

138 **Fig. S6** The configuration of (a1, b1, and c1)  $O_2$  molecule adsorbed and (a4, b4, and c4) CO molecule squeezes out  
 139  $O_2$  molecule that has pre-adsorbed on Au, Cu, and Ag systems, the configuration under (a2, b2, and c2) ER and  
 140 (a3, b3, and c3) LH mechanism of Au, Cu, and Ag-DACs.

141  
 142  
 143  
 144  
 145  
 146  
 147  
 148  
 149  
 150  
 151  
 152  
 153  
 154  
 155  
 156  
 157  
 158  
 159  
 160  
 161  
 162  
 163  
 164  
 165  
 166  
 167  
 168  
 169

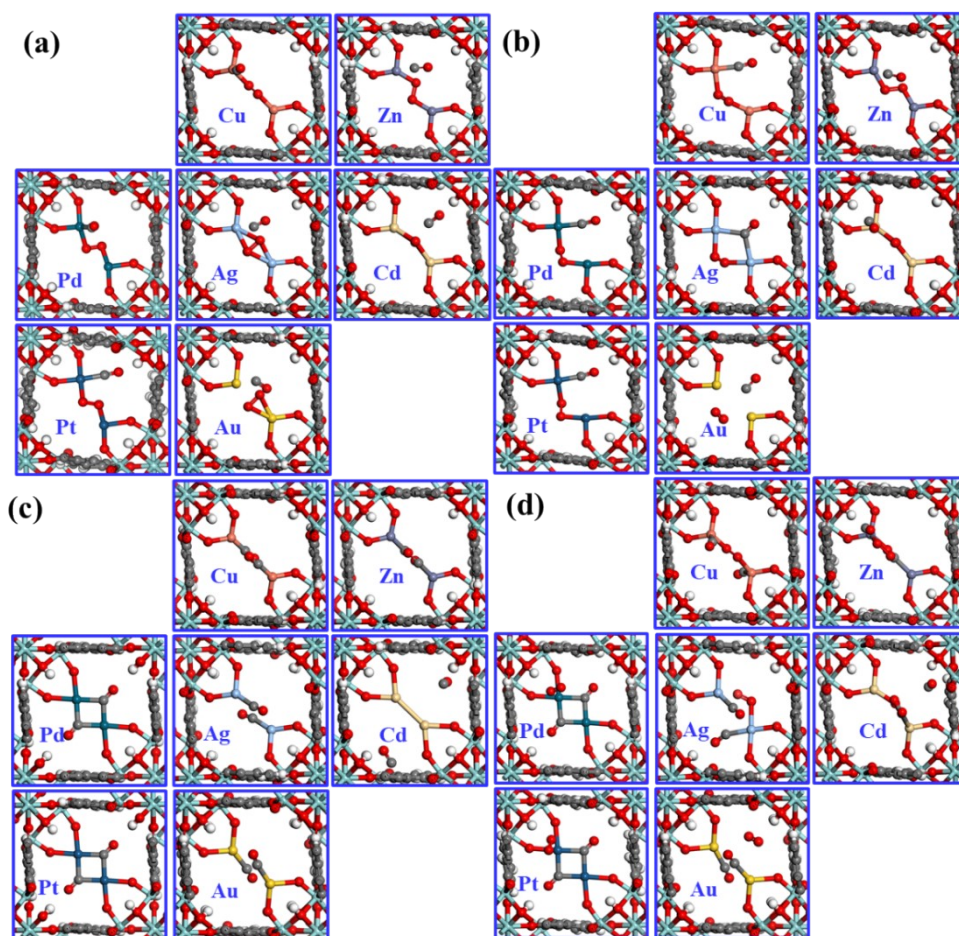

170

171 **Fig. S7** The top side of M/UIO-66 under (a) ER mechanism, (b) LH mechanism, (c) two CO molecules adsorbed,  
 172 and (d) TER mechanism.

173

174

175

176

177

178

179

180

181

182

183

184

185

186

187

188

189

190

191

192

193

194

195

196

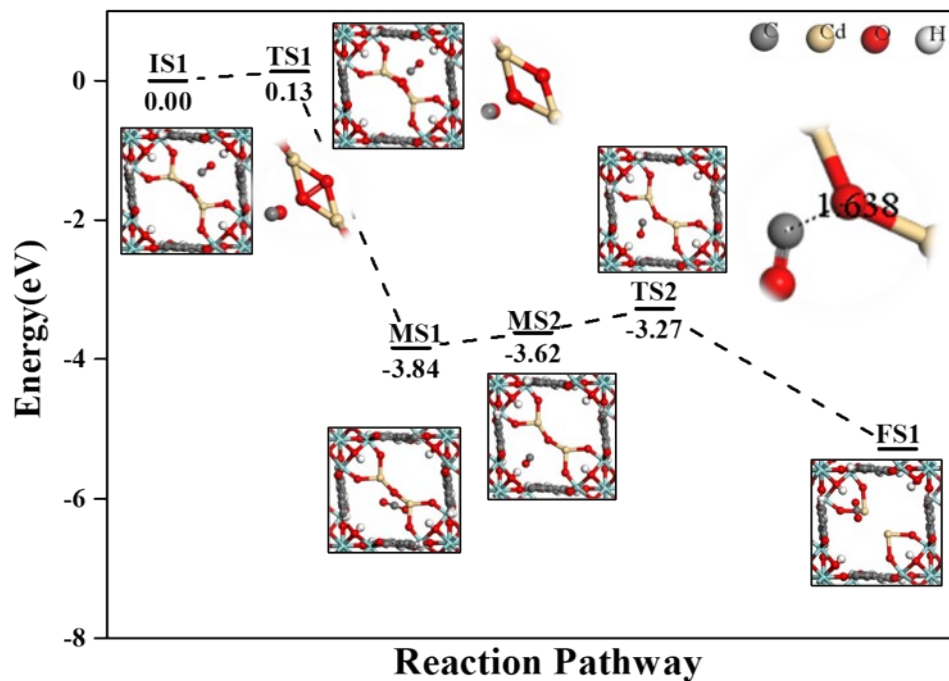

197

198 Fig. S8 The ER mechanism reaction pathway of Cd/Uio-66 has two situations. This one is dominant, the other is  
 199 shown in Fig. S9.

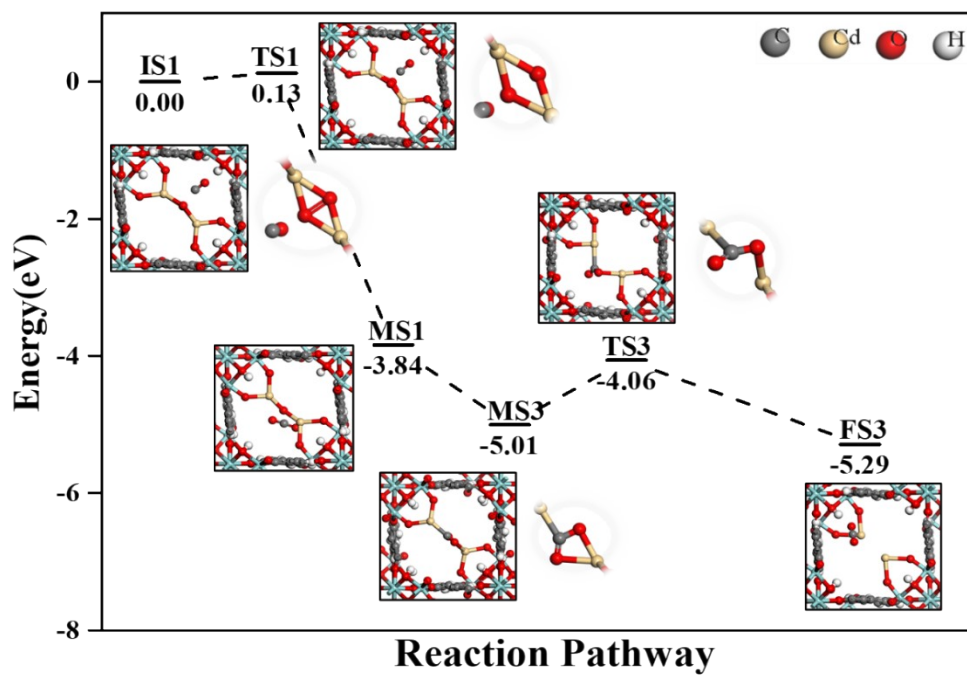

200 Fig. S9 The ER mechanism reaction pathway of Cd/Uio-66 has two situations. This one is more vulnerable.

201  
 202  
 203  
 204  
 205  
 206  
 207  
 208

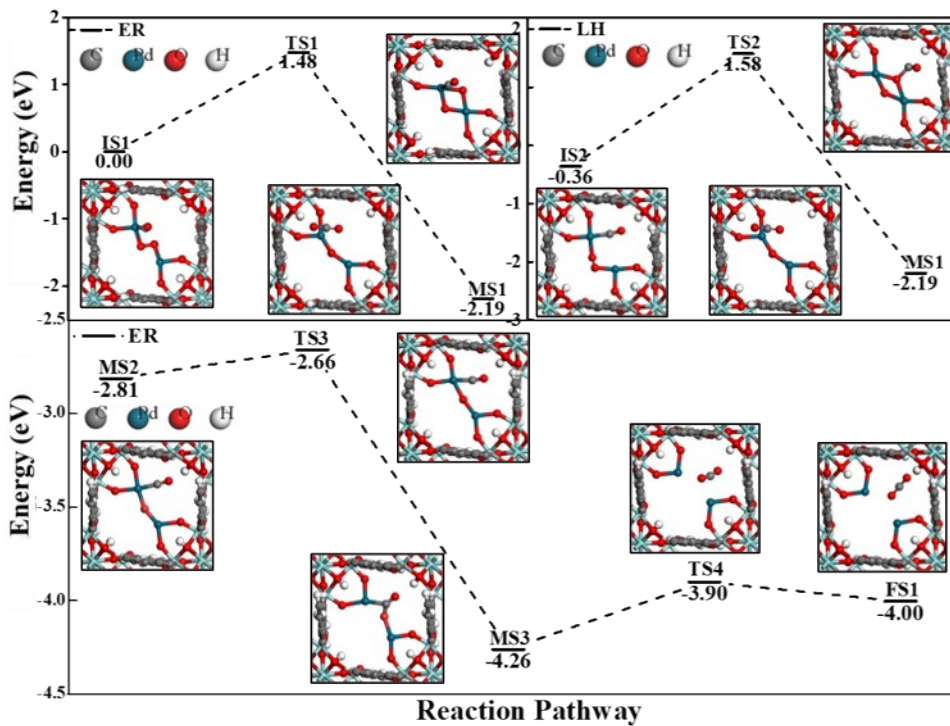

209 Fig. S10 The ER and LH mechanism reaction pathway of Pd/Uio-66.

210

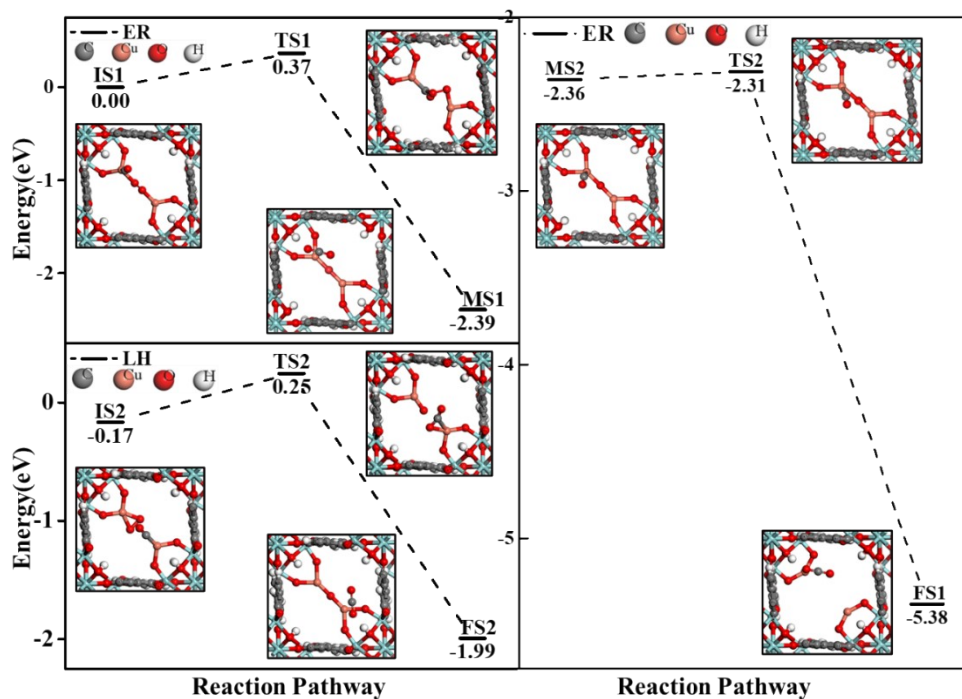

211

212 Fig. S11 The ER and LH mechanism reaction pathway of Cu/Uio-66.

213

214

215

216

217



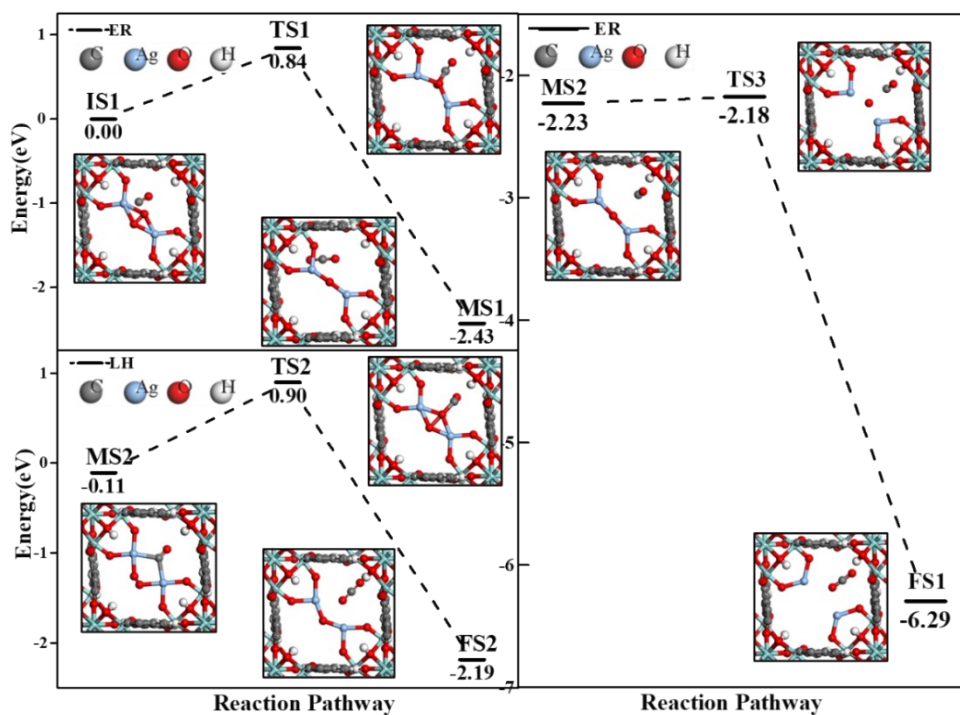

218  
219  
220

221 **Fig. S12** The ER and LH mechanism reaction pathway of Ag/Uio-66.

222

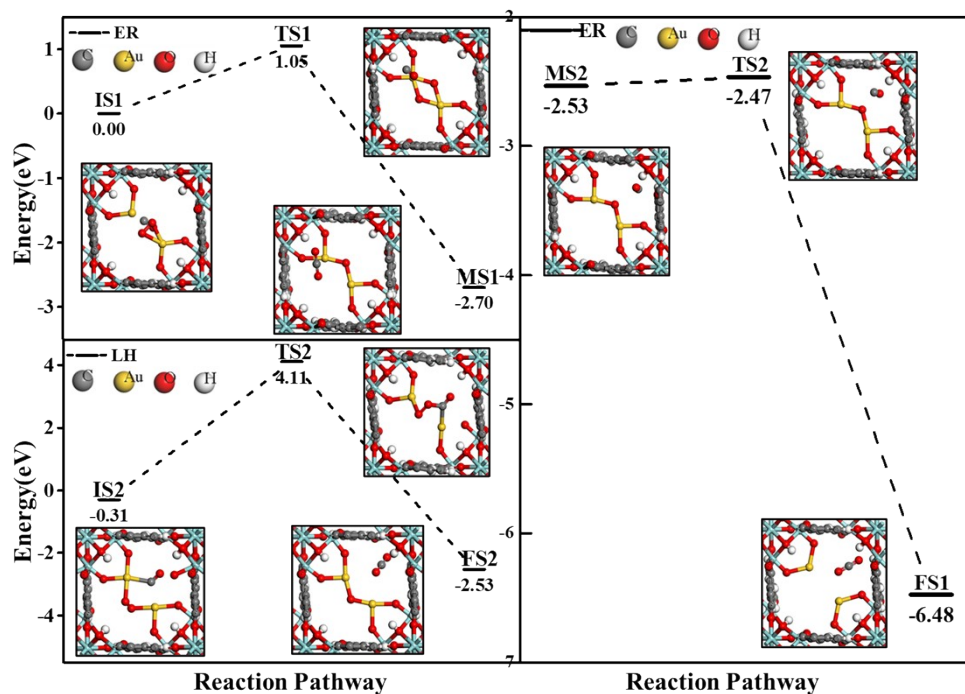

223  
224

225 **Fig. S13** The ER and LH mechanism reaction pathway of Au/Uio-66.

226

227

228

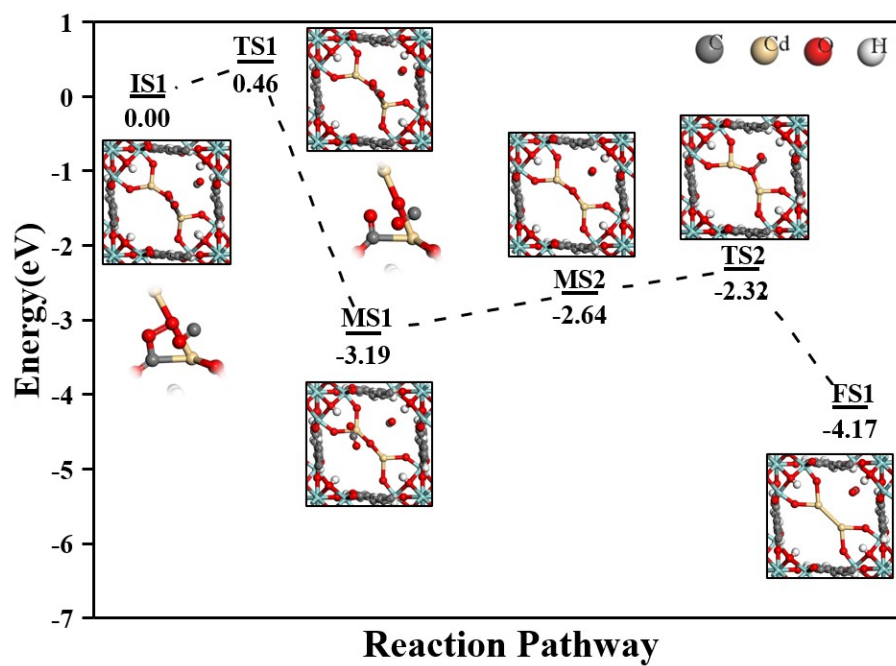

229 Fig. S14 The TER mechanism reaction pathway of Cd/Uio-66.

230

231

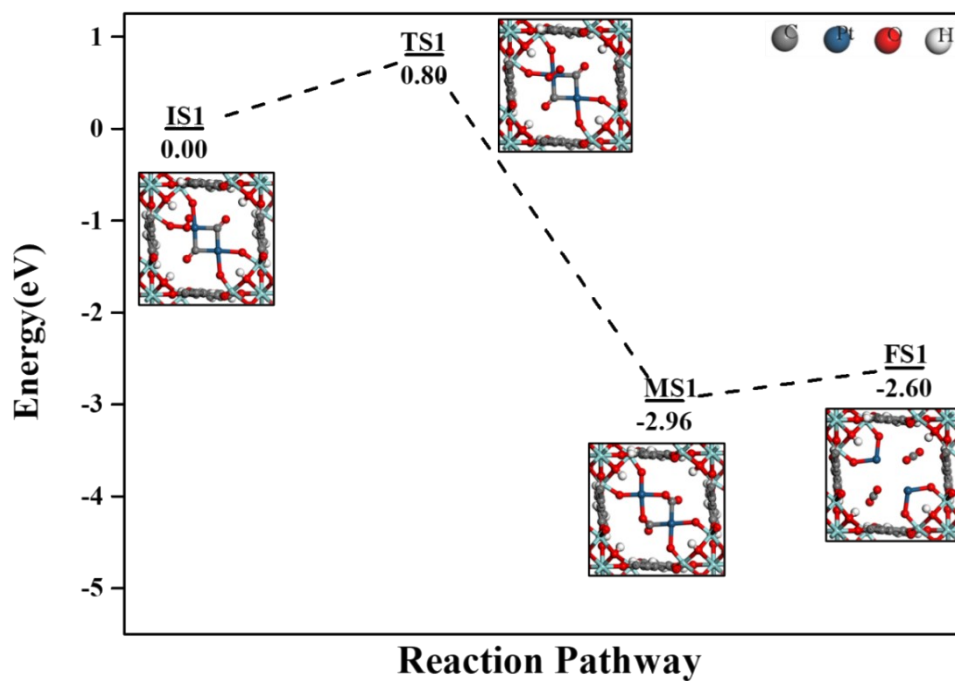

232

233

234 Fig. S15 The TER mechanism reaction pathway of Pt/Uio-66.

235  
236

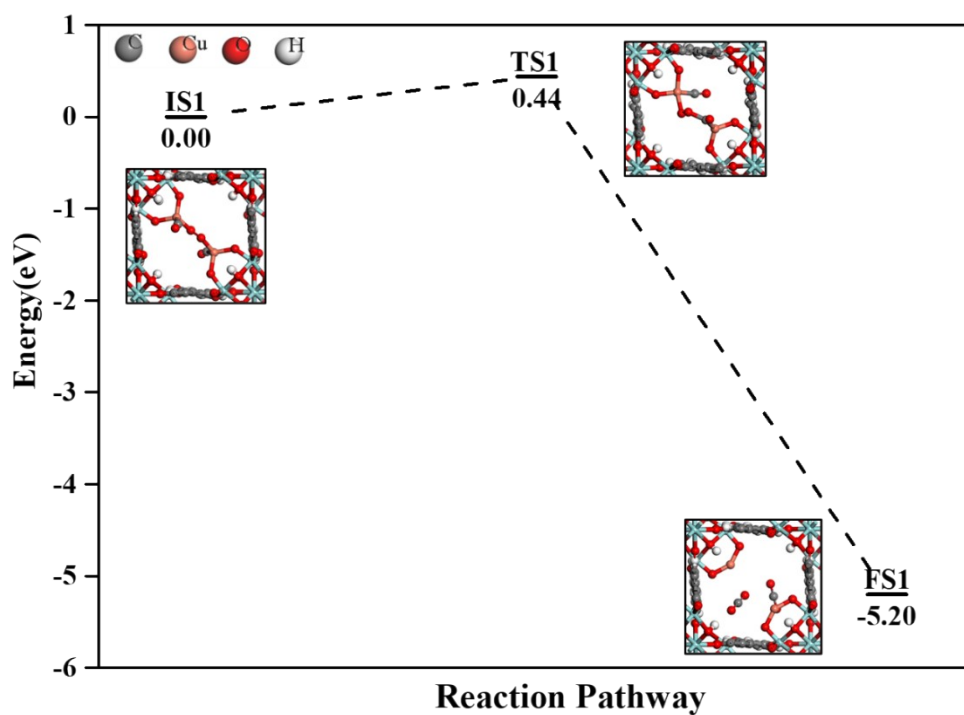

237  
238  
239  
240  
241  
242

Fig. S16 The TER mechanism reaction pathway of Cu/Uio-66.

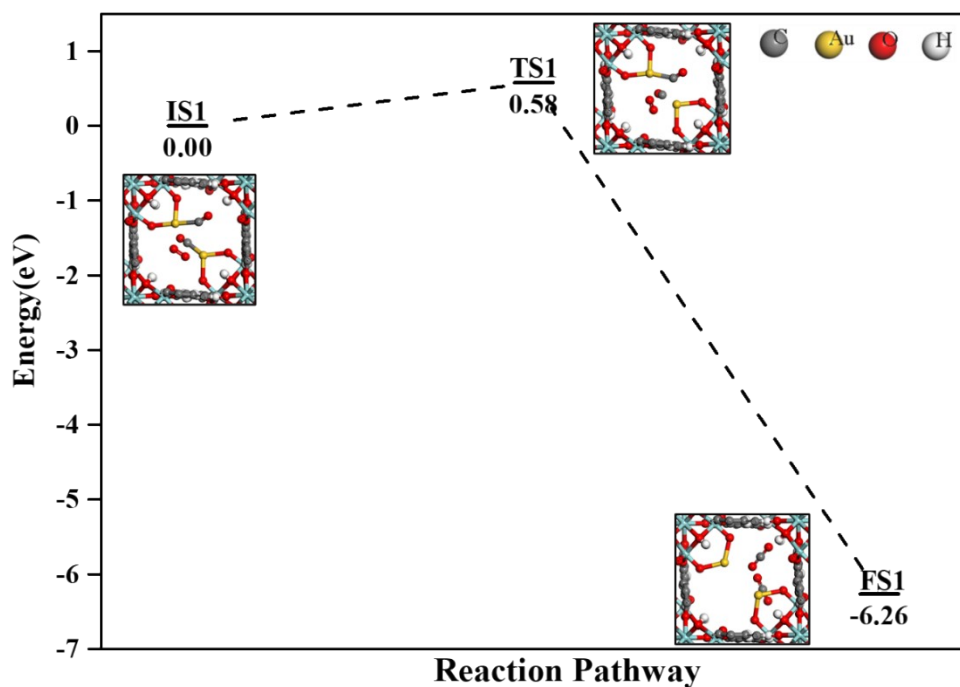

243

244 Fig. S17 The TER mechanism reaction pathway of Au/Uio-66.
